# Supplementary material for: Searching for EGF Fragments Recreating the Outer Sphere of the Growth Factor Involved in Receptor Interactions
Source: MDPI journal article supplement (doi:10.3390/ijms25031470), 2024-01-25
Supplement: s1 [file s1]

## Searching for EGF fragments recreating the outer sphere growth factor involved in receptor interactions

Katarzyna Czerczak-Kwiatkowska<sup>1</sup>, Marta Kamiska<sup>2</sup>, Justyna Fraczyk<sup>1</sup>, Ireneusz Majsterek<sup>3</sup>, Beata Kolesinska<sup>1\*</sup>

1. Institute of Organic Chemistry, Faculty of Chemistry, Lodz University of Technology, Zeromskiego 116, 90-924 Lodz, Poland; katarzyna.czerczak@dokt.p.lodz.pl (K.C-K.); justyna.fraczyk@p.lodz.pl (J.F.); beata.kolesinska@p.lodz.pl (B.K.)

2. Division of Biophysics, Institute of Materials Science and Engineering, Lodz University of Technology, Stefanowskiego 1/15, 90-924 Lodz, Poland; marta.kaminska@p.lodz.pl (M.K.)

3. Department of Clinical Chemistry and Biochemistry, Medical University of Lodz, Narutowicza 60, 90-136 Lodz, Poland; ireneusz.majsterek@umed.lodz.pl (I.M.)

### Modification of cellulose substrate - incorporation of a triazine linker immobilized on cellulose

A procedure previously developed by us was used to obtain the isocyanurate derivative of amino acid attached to cellulose [1].

#### *Immobilization of 2,4-dichloro-6-methoxy-1,3,5-triazine (DCMT) on cellulose*

Whatman 1 CHR cellulose sheets (4 pieces) on dimensions 10 x 15 cm, were treated with 1.0 M aq. NaOH (500 mL) for 30 min. The base solution was then removed, and the cellulose sheets were dried with a paper towel. In the next step, they were treated with 1.2 M solution of 2,4-dichloro-6-methoxy-1,3,5-triazine (DCMT) (111 g, 0.6 mol) in THF (500 mL). Solid, finely powdered NaHCO<sub>3</sub> (50.4 g, 0.6 mol) and diisopropylamine (DIPEA) (108 mL, 0.6 mol) were added to the solution. After 3 hours the solution was removed, and the cellulose was washed sequentially with THF (3 x 150 mL), acetone (3 x 150 mL), and CH<sub>2</sub>Cl<sub>2</sub> (3 x 150 mL) and allowed to air dry.

#### *Functionalization of DCMT-modified cellulose with N-methylmorpholine (NMM)*

DCMT-modified cellulose sheets were treated with a solution of N-methylmorpholine (NMM) in THF (v: v 1: 1) (200 mL). The reactions were carried out for 30 minutes by vigorously shaking the mixture. The NMM solution was then removed and the cellulose sheets were washed with THF (2 x 150 mL, 5 min) and dried with a paper towel.

#### *C-terminal Fmoc-glycine incorporation (synthesis of Fmoc-Gly triazine ester immobilized on cellulose)*

Cellulose sheets functionalized with DCMT and N-methylmorpholine (NMM) (4 pieces) were treated with Fmoc-Gly-OH (4.46 g, 15 mmol), (825  $\mu$ L, 7.5 mmol) in 100 mL THF : dichloromethane (DCM) (1 : 1). The reaction was carried out for 1.5 h with gentle shaking.

The solution was then removed, the cellulose sheets were washed with DMF (2 x 150 mL) for 5 min and CH<sub>2</sub>Cl<sub>2</sub> (2 x 150 mL) for 5 min and then dried with a paper towel.

#### *Thermal rearrangement of the Fmoc-Gly triazine ester immobilized on cellulose*

The dried Fmoc-Gly triazine ester modified cellulose sheets were heated in refluxing toluene for 8 h. The solvent was then removed, the sheets were dried with a paper towel and dried in a vacuum desiccator until constant weight.

#### *Acetylation of a cellulose matrix modified with an isocyanurate derivative of Fmoc-Gly*

The cellulose sheets were treated with a 10% solution of acetic anhydride (5 mL, 0.088 mol) in DMF (35 mL) in the presence of a 20% solution of diisopropylethylamine (10 mL, 0.057 mmol). After 30 min of gentle shaking, the acetylation mixture was removed, and the cellulose sheets were washed with DMF (2 x 50 mL) 5 min, CH<sub>2</sub>Cl<sub>2</sub> (2 x 50 mL) 5 min, and C<sub>2</sub>H<sub>5</sub>OH (3 x 50 mL) 5 min and again

$\text{CH}_2\text{Cl}_2$  (2 x 50 mL) ) 5 min. The solvent was then removed, and the sheets were dried with a paper towel and dried in a vacuum desiccator until constant weight.

***Fmoc deprotection from the C-terminal glycine residue immobilized on cellulose***

The Fmoc group from the amine glycine function was removed by treatment with 25% piperidine in DMF (40 mL). The cellulose sheets immersed in the solution were gently shaken for 30 min, then the solution was removed, the cellulose sheets were washed in 5-minute cycles with DMF (3 x 40 mL). The synthesis scheme is shown in Figure S1.

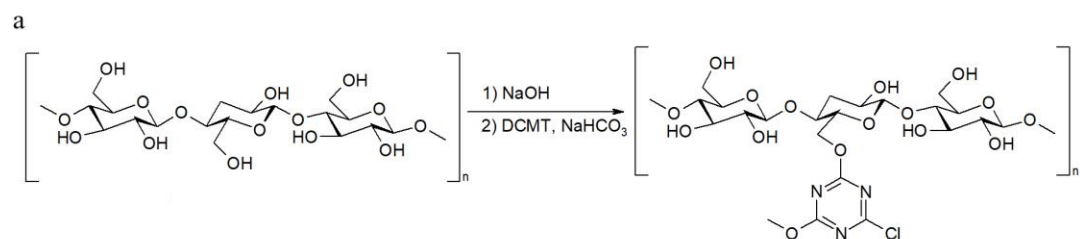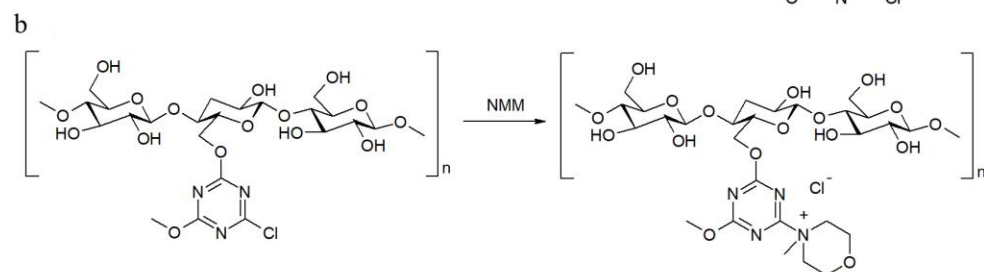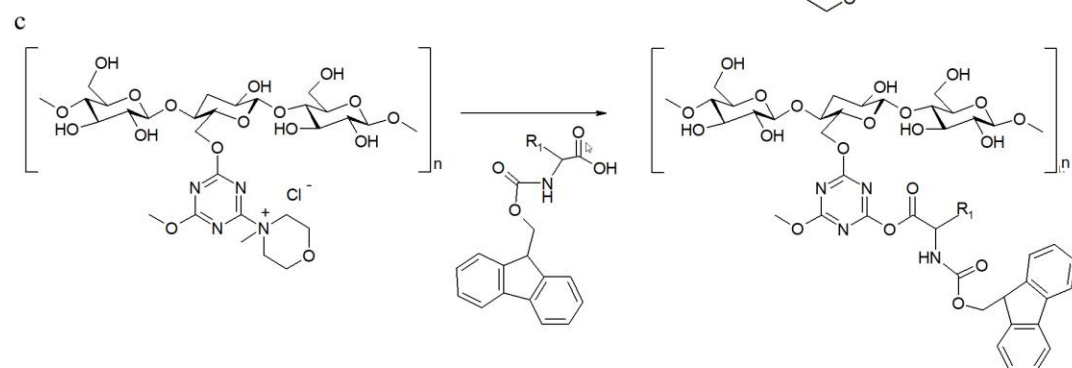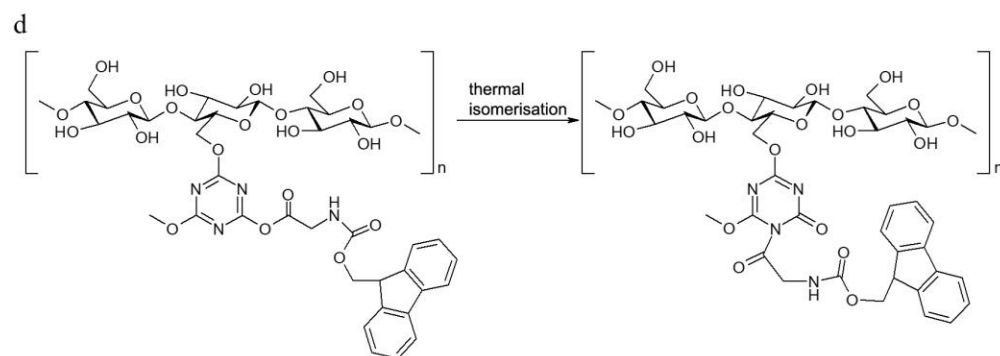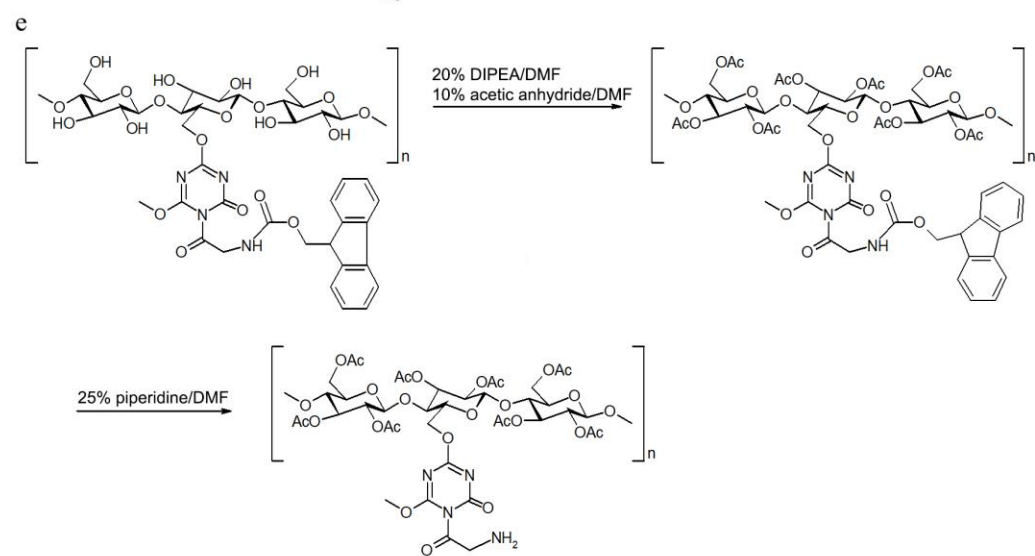

**Figure S1.** Cellulose functionalization resulting in a cellulose matrix useful in SPOT synthesis of peptide library.

The obtained modified cellulose was used in the automatic SPOT synthesis [1]. The synthesis was performed using a synthetic protocol developed by us using triazine condensing reagents [2].

### Automatic SPOT synthesis of the library of EGF fragments

Detailed protocols and reports from Intavis' SPOT ResPep SL automatic synthesizer are presented below.

*Incorporation of the first amino acid. Report on the work of the automatic synthesizer*

```

Prepare
... 1 Memo          ResPep SL version, SPOT method
... 2 RinseNeedle   1000 / 1500 ul
... 3 WashMembrane 1500 µl, solvent - 2, 2x
... 4 Extract       720 s
...
Cycle : 1 -> 1
... 5 PreActivate   0.15+0.073+0.003+0.17->Peptides
... 6 Coupling      (PreActivate)->Peptides
... 7 Coupling      (PreActivate)->Peptides
... 8 RinseNeedle   500 / 1500 ul
... 9 Extract       120 s
... 10 PreActivate  0.15+0.073+0.003+0.17->Peptides
... 11 Coupling     (PreActivate)->Peptides
... 12 Coupling     (PreActivate)->Peptides
... 13 RinseNeedle  500 / 1500 ul
... 14 WashMembrane 1500 µl, solvent - 1, 4x
... 15 WashMembrane 1500 µl, solvent - 2, 2x
... 16 Extract       60 s
... 17 RinseNeedle  500 / 1500 ul

```

*The synthesis was programmed according to the following procedure:*

```

Activator          76.8
Base               40.5
NMP                7.5
Piperidine         Piperidine 20%  468.8  93.8 ml

reagents weight calculation:
  3 % relative + 6000 µl absolute excess

Piperidine:                C = 0 %

Notes:
HOBt                      135.12 g/mol
HOBt . H2O  153.12 g/mol
HOAt                      136.11 g/mol
Oxyma Pure  142.10 g/mol
all stocks in DMF or NMP @ a 1.5 M solution

DIC      MW 126,2      d=0,815
1.1M solution ~ 17.033 %

Solvents used :
Dilutor-1
Reservoir    DMF          1336

Dilutor-2
Solvent-1    solvent 1    1692
Solvent-2    solvent 2    720

```

For a better visualization of the automatic SPOT synthesis procedure, the figures below show reports on the individual stages of cycle 1.

*Cycle 1, Step 5 - Pre-Activation:*

| Parameter                  |                                     | Advanced  |        |
|----------------------------|-------------------------------------|-----------|--------|
| Sources                    |                                     |           |        |
| source zones :             | Activator 0.15 $\mu$ l              | 0.15      |        |
|                            | Base 0.073 $\mu$ l                  |           |        |
|                            | NMP 0.003 $\mu$ l                   |           |        |
|                            | Derivatives 0.17 $\mu$ l            |           |        |
|                            | ...                                 |           |        |
|                            |                                     | Insert... | Delete |
| Mix Activation             |                                     |           |        |
| aspiration speed :         | 10                                  | ml/min    |        |
| dispense speed :           | 20                                  | ml/min    |        |
| dispense dZ up :           | 200                                 | 0.1mm     |        |
| mixing cycles :            | 2                                   | 1..n      |        |
| Pipetting                  |                                     |           |        |
| excess vol. aminoac. :     | 100                                 | $\mu$ l   |        |
| aspiration speed :         | 5                                   | ml/min    |        |
| dispense speed :           | 5                                   | ml/min    |        |
| air gap volume :           | 6                                   | $\mu$ l   |        |
| press. equil. time :       | 3                                   | s         |        |
| Coupling                   |                                     |           |        |
| coupling type parameter :  | - ignore -                          |           |        |
| activation time :          | 6                                   | min       |        |
| as min. Time in Coupling : | <input checked="" type="checkbox"/> |           |        |

*Cycle 1, step 6, 7- Coupling:*

| Parameter              |                          | Advanced |  |
|------------------------|--------------------------|----------|--|
| Pre-Activation !       |                          |          |  |
| Coupling               |                          |          |  |
| coupling react. time : | 3                        | min      |  |
| set PreSpot :          | <input type="checkbox"/> |          |  |
| target Z-home down :   | 0                        | 0.1mm    |  |
| Pipetting              |                          |          |  |
| aspiration speed :     | 0.5                      | ml/min   |  |
| dispense speed :       | 8                        | ml/min   |  |
| max. dispense-batch :  | 200                      | 1..n     |  |
| air gap volume :       | 2                        | $\mu$ l  |  |
| pressure equil. time : | 2                        | s        |  |

*Cycle 1, step 8 - Washing the needle:*

| Parameter            |      |         |  |
|----------------------|------|---------|--|
| RinseNeedle          |      |         |  |
| inside rinse vol. :  | 500  | $\mu$ l |  |
| outside rinse vol. : | 1500 | $\mu$ l |  |
| rinse dispense sp. : | 10   | ml/min  |  |
| pressure equil. :    | 0    | s       |  |

*Cycle 1, step 14, 15 - Washing the membrane:*

| Parameter                |             | Advanced |         |
|--------------------------|-------------|----------|---------|
| <b>WashMembrane</b>      |             |          |         |
| source reservoir :       | solvent - 1 |          |         |
| wash volume (row) :      | 1500        | μl       |         |
| wash dispense speed :    | 100         | ml/min   |         |
| pressure equilibration : | 3           | s        |         |
| wash time :              | 0           | :        | 5 mm:ss |
| target zone :            | Membrane    |          |         |
| execute task n times :   | 4           | n        |         |
| <b>Extract</b>           |             |          |         |
| Extraction time (0=OFF): | 60          | s        |         |
| wait after Extraction :  | 30          | s        |         |

*Cycle 1, step 16 - Membrane drying:*

| Parameter                |      |
|--------------------------|------|
| <b>Extract</b>           |      |
| Extraction time (0=OFF): | 60 s |
| wait after Extraction :  | 10 s |

*Incorporation of the second amino acid. Report on the work of the automatic synthesizer*

```

Cycle : 2 -> "max" (-> 10)
..... 18 Deprotection    500 μl, Piperidine->Membrane
..... 19 Deprotection    500 μl, Piperidine->Membrane
..... 20 RinseNeedle     500 / 1500 ul
..... 21 WashMembrane    1500 μl, solvent - 1, 6x
..... 22 WashMembrane    1500 μl, solvent - 2, 2x
..... 23 Extract          900 s
..... 24 PreActivate      0.15+0.073+0.003+0.17->Peptides
..... 25 Coupling         (PreActivate)->Peptides
..... 26 Coupling         (PreActivate)->Peptides
..... 27 RinseNeedle     500 / 1500 ul
..... 28 Extract          120 s
..... 29 PreActivate      0.15+0.073+0.003+0.17->Peptides
..... 30 Coupling         (PreActivate)->Peptides
..... 31 Coupling         (PreActivate)->Peptides
..... 32 RinseNeedle     500 / 1500 ul
..... 33 WashMembrane    1500 μl, solvent - 1, 4x
..... 34 WashMembrane    1500 μl, solvent - 2, 2x
..... 35 Extract          60 s
..... 36 RinseNeedle     500 / 1500 ul

```

In cycle 2, the additional stage that started this cycle was the deprotection of the Fmoc group. To better illustrate the parameters of the procedure of this stage, the report generated by the synthesizer is presented below. The incorporation of subsequent amino acids was analogous to the procedure described in cycle 2.

| Parameter                 |            | Advanced |  |
|---------------------------|------------|----------|--|
| <b>Zones</b>              |            |          |  |
| source zone :             | Piperidine |          |  |
| target zone :             | Membrane   |          |  |
| target zone Z-up :        | 0          | 0.1mm    |  |
| target move Z-down :      | 0          | 0.1mm    |  |
| dilutor no. :             | 1          | 1..4     |  |
| <b>Pipetting</b>          |            |          |  |
| dispense volume :         | 500        | μl       |  |
| discard volume :          | 20         | μl       |  |
| aspirate speed :          | 2          | ml/min   |  |
| dispense speed :          | 5          | ml/min   |  |
| <b>Reaction</b>           |            |          |  |
| reaction time :           | 10         | min      |  |
| <b>Airgap</b>             |            |          |  |
| air gap volume :          | 6          | ul       |  |
| number air gaps :         | 1          | 0.5      |  |
| pressure eqil. Aspirate : | 2          | s        |  |
| pressure eqil. Dispense : | 0          | s        |  |
| <b>Extract</b>            |            |          |  |
| Extraction time (0=OFF):  | 120        | s        |  |
| wait after Extraction :   | 30         | s        |  |

**Figure S2.** Synthetic protocols generated during automatic SPOT synthesis using from Intavis' SPOT ResPep SL automatic synthesizer.

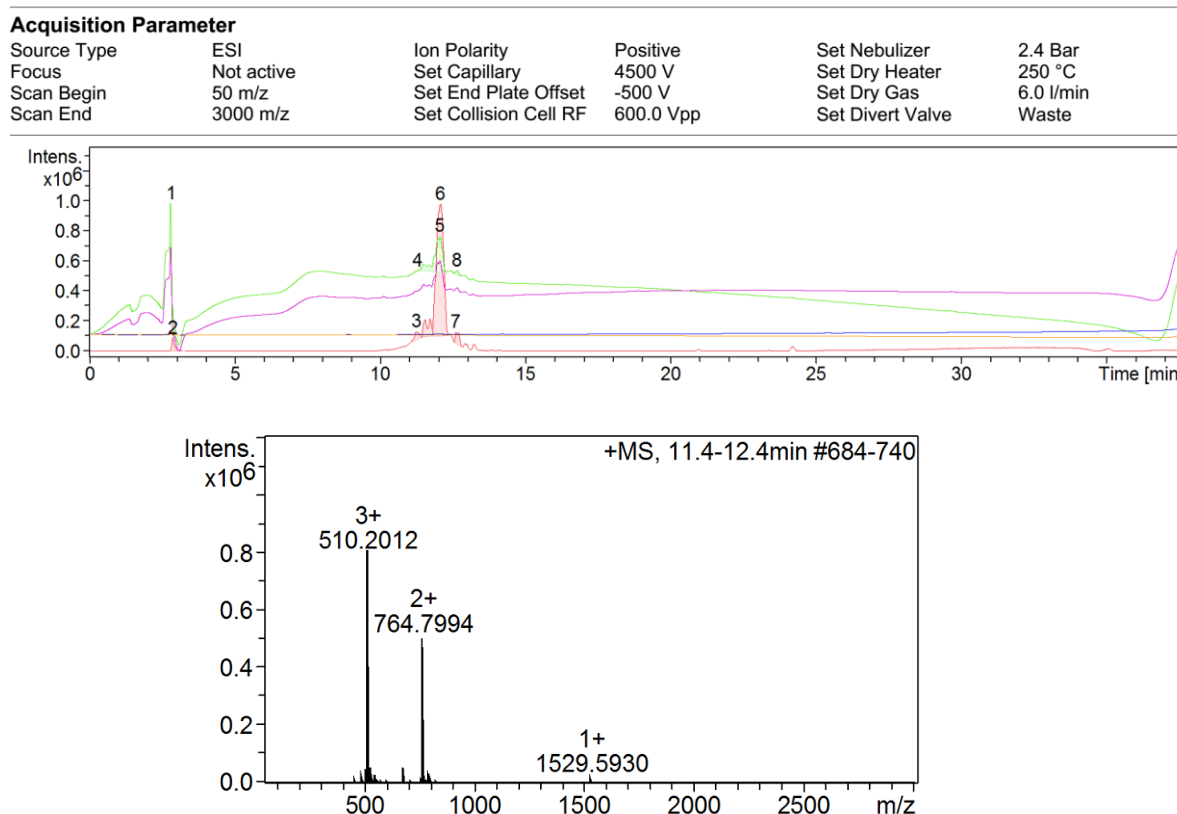

**Figure S3.** LC-MS spectrum of  $^{10}\text{HDGYCLHDGVCMY}^{22}$  fragment.

**Acquisition Parameter**

|             |            |                       |           |                  |           |
|-------------|------------|-----------------------|-----------|------------------|-----------|
| Source Type | ESI        | Ion Polarity          | Positive  | Set Nebulizer    | 2.4 Bar   |
| Focus       | Not active | Set Capillary         | 4500 V    | Set Dry Heater   | 250 °C    |
| Scan Begin  | 50 m/z     | Set End Plate Offset  | -500 V    | Set Dry Gas      | 6.0 l/min |
| Scan End    | 3000 m/z   | Set Collision Cell RF | 600.0 Vpp | Set Divert Valve | Waste     |

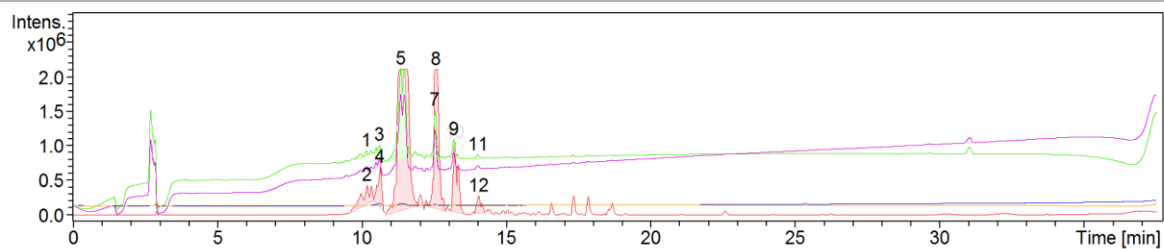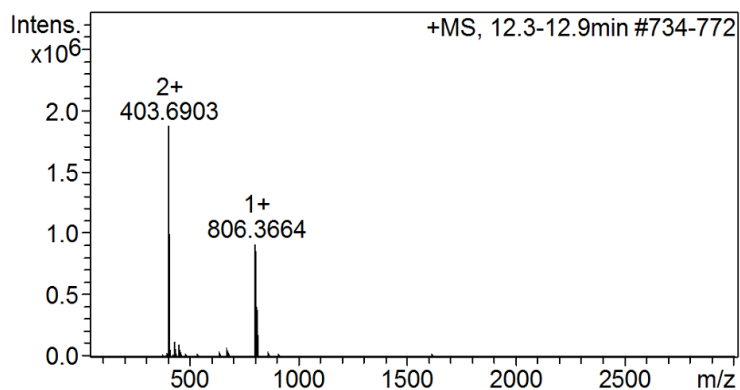

**Figure S4.** LC-MS spectrum of  $^{13}\text{YCLHDGV}^{19}$  fragment.

**Acquisition Parameter**

|             |            |                       |           |                  |           |
|-------------|------------|-----------------------|-----------|------------------|-----------|
| Source Type | ESI        | Ion Polarity          | Positive  | Set Nebulizer    | 2.4 Bar   |
| Focus       | Not active | Set Capillary         | 4500 V    | Set Dry Heater   | 250 °C    |
| Scan Begin  | 50 m/z     | Set End Plate Offset  | -500 V    | Set Dry Gas      | 6.0 l/min |
| Scan End    | 3000 m/z   | Set Collision Cell RF | 600.0 Vpp | Set Divert Valve | Waste     |

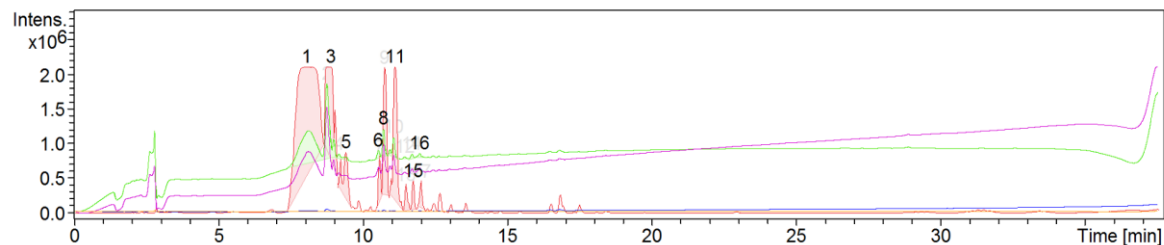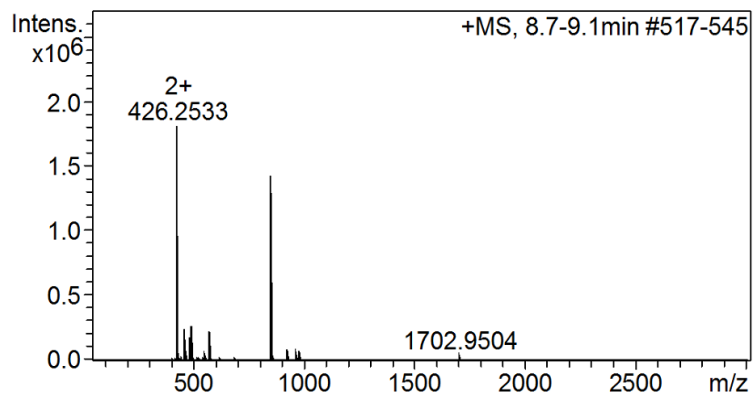

**Figure S5.** LC-MS spectrum of  $^{22}\text{YIEALDK}^{28}$  fragment.



**Acquisition Parameter**

|             |            |                       |           |                  |           |
|-------------|------------|-----------------------|-----------|------------------|-----------|
| Source Type | ESI        | Ion Polarity          | Positive  | Set Nebulizer    | 2.4 Bar   |
| Focus       | Not active | Set Capillary         | 4500 V    | Set Dry Heater   | 250 °C    |
| Scan Begin  | 50 m/z     | Set End Plate Offset  | -500 V    | Set Dry Gas      | 6.0 l/min |
| Scan End    | 3000 m/z   | Set Collision Cell RF | 600.0 Vpp | Set Divert Valve | Waste     |

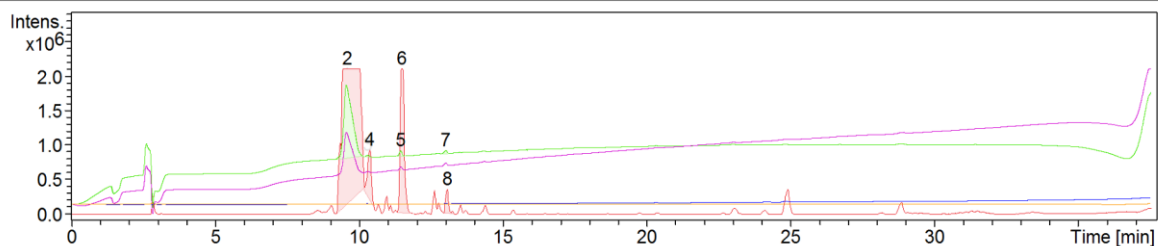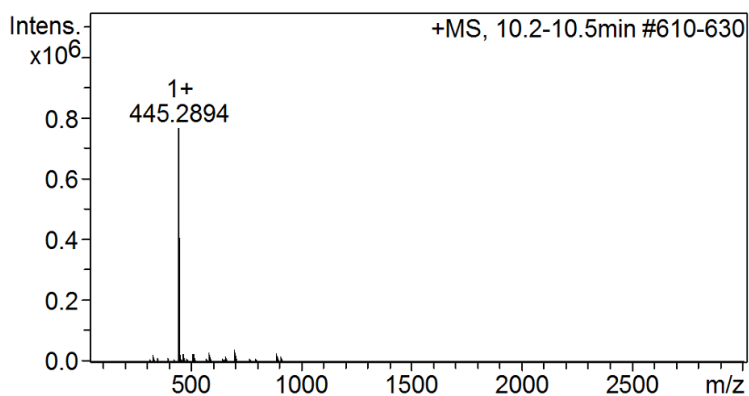

**Figure S6.** LC-MS spectrum of <sup>23</sup>IEAL<sup>26</sup> fragment.

**Acquisition Parameter**

|             |            |                       |           |                  |           |
|-------------|------------|-----------------------|-----------|------------------|-----------|
| Source Type | ESI        | Ion Polarity          | Positive  | Set Nebulizer    | 2.4 Bar   |
| Focus       | Not active | Set Capillary         | 4500 V    | Set Dry Heater   | 250 °C    |
| Scan Begin  | 50 m/z     | Set End Plate Offset  | -500 V    | Set Dry Gas      | 6.0 l/min |
| Scan End    | 3000 m/z   | Set Collision Cell RF | 600.0 Vpp | Set Divert Valve | Waste     |

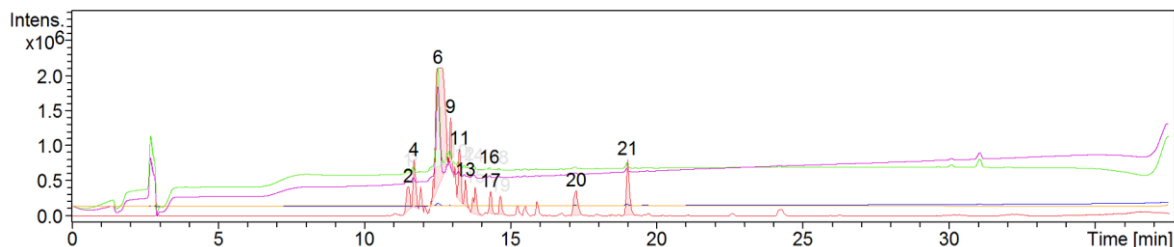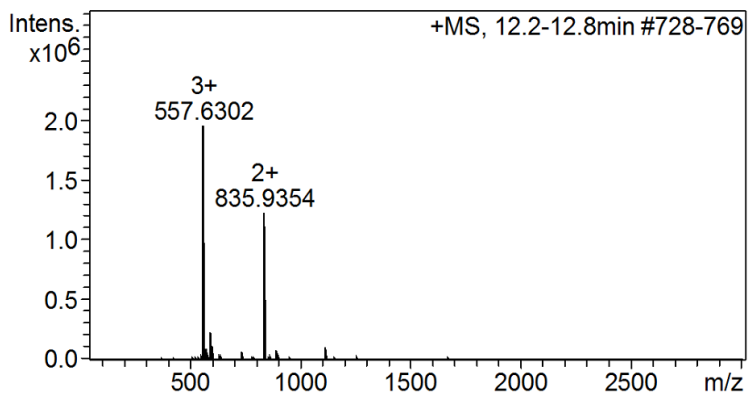

**Figure S7.** LC-MS spectrum of <sup>34</sup>VVG YIGERCQYRDL<sup>47</sup> fragment.

**Acquisition Parameter**

|             |            |                       |           |                  |           |
|-------------|------------|-----------------------|-----------|------------------|-----------|
| Source Type | ESI        | Ion Polarity          | Positive  | Set Nebulizer    | 2.4 Bar   |
| Focus       | Not active | Set Capillary         | 4500 V    | Set Dry Heater   | 250 °C    |
| Scan Begin  | 50 m/z     | Set End Plate Offset  | -500 V    | Set Dry Gas      | 6.0 l/min |
| Scan End    | 3000 m/z   | Set Collision Cell RF | 600.0 Vpp | Set Divert Valve | Waste     |

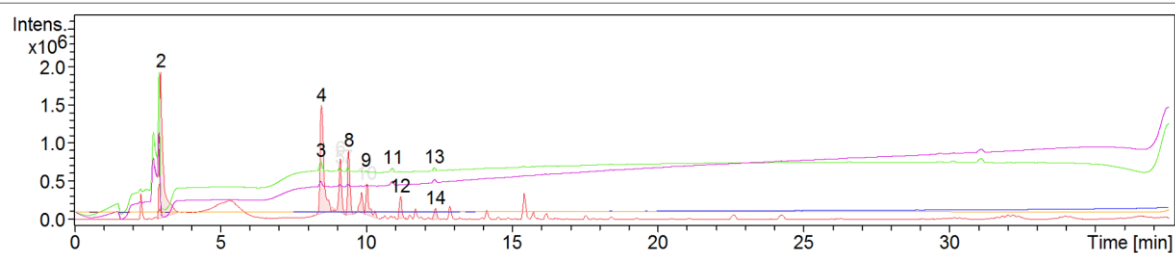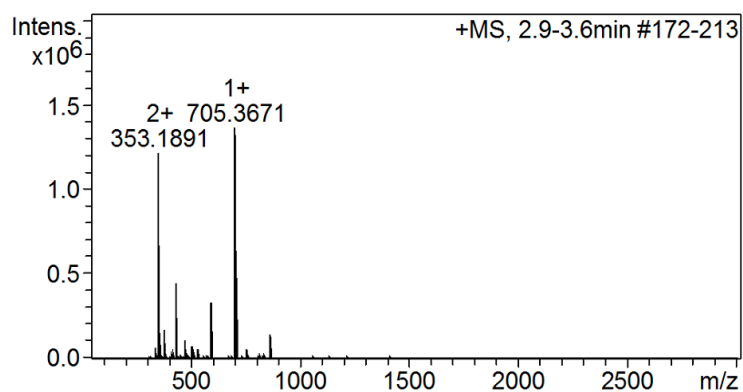

**Figure S8.** LC-MS spectrum of  $^{38}\text{IGERCQ}^{43}$  fragment.

**Acquisition Parameter**

|             |            |                       |           |                  |           |
|-------------|------------|-----------------------|-----------|------------------|-----------|
| Source Type | ESI        | Ion Polarity          | Positive  | Set Nebulizer    | 2.4 Bar   |
| Focus       | Not active | Set Capillary         | 4500 V    | Set Dry Heater   | 250 °C    |
| Scan Begin  | 50 m/z     | Set End Plate Offset  | -500 V    | Set Dry Gas      | 6.0 l/min |
| Scan End    | 3000 m/z   | Set Collision Cell RF | 600.0 Vpp | Set Divert Valve | Waste     |

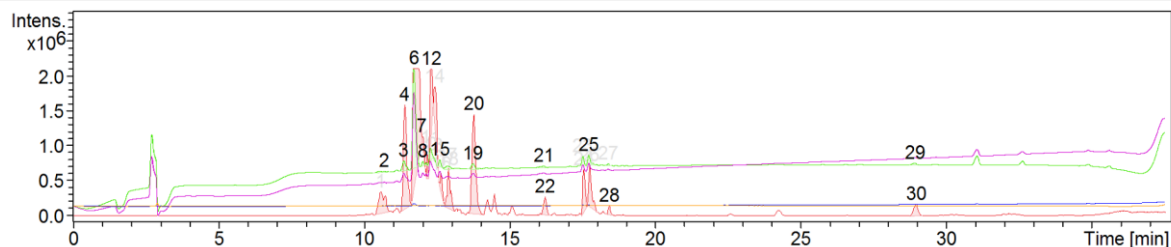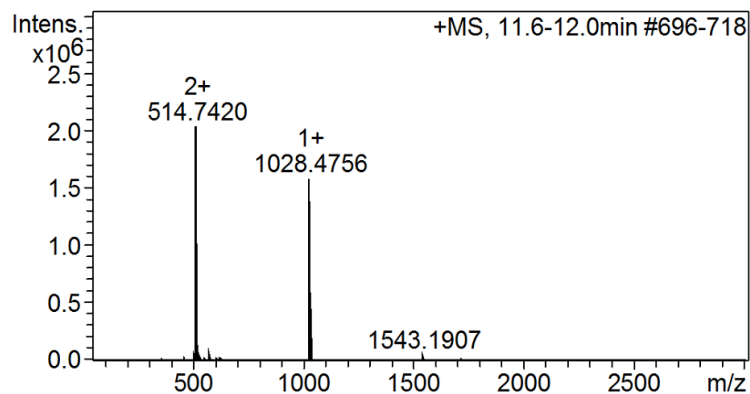

**Figure S9.** LC-MS spectrum of  $^{26}\text{LDKYACNCV}^{34}$  fragment.

**Acquisition Parameter**

|             |            |                       |           |                  |           |
|-------------|------------|-----------------------|-----------|------------------|-----------|
| Source Type | ESI        | Ion Polarity          | Positive  | Set Nebulizer    | 0.5 Bar   |
| Focus       | Not active | Set Capillary         | 4500 V    | Set Dry Heater   | 200 °C    |
| Scan Begin  | 50 m/z     | Set End Plate Offset  | -500 V    | Set Dry Gas      | 5.0 l/min |
| Scan End    | 3000 m/z   | Set Collision Cell RF | 600.0 Vpp | Set Divert Valve | Waste     |

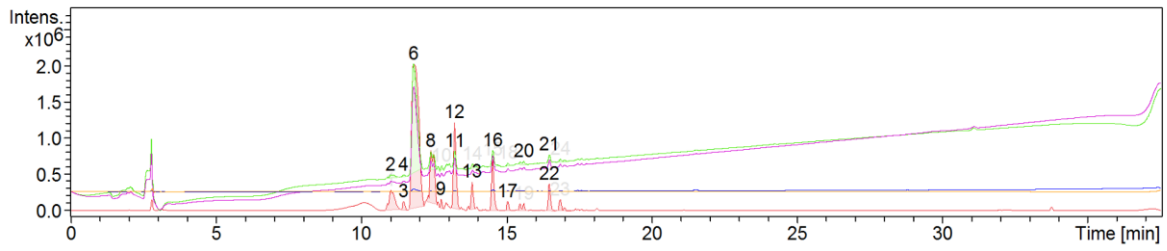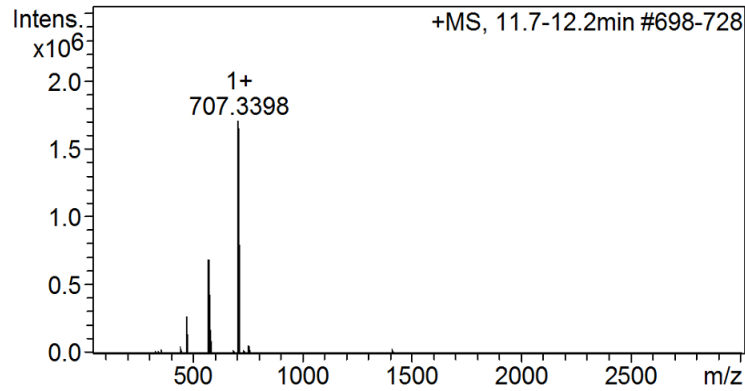

**Figure S10.** LC-MS spectrum of  $^{10}\text{HDGYCL}^{15}$  fragment.

**Acquisition Parameter**

|             |            |                       |           |                  |           |
|-------------|------------|-----------------------|-----------|------------------|-----------|
| Source Type | ESI        | Ion Polarity          | Positive  | Set Nebulizer    | 0.5 Bar   |
| Focus       | Not active | Set Capillary         | 4500 V    | Set Dry Heater   | 200 °C    |
| Scan Begin  | 50 m/z     | Set End Plate Offset  | -500 V    | Set Dry Gas      | 5.0 l/min |
| Scan End    | 3000 m/z   | Set Collision Cell RF | 600.0 Vpp | Set Divert Valve | Waste     |

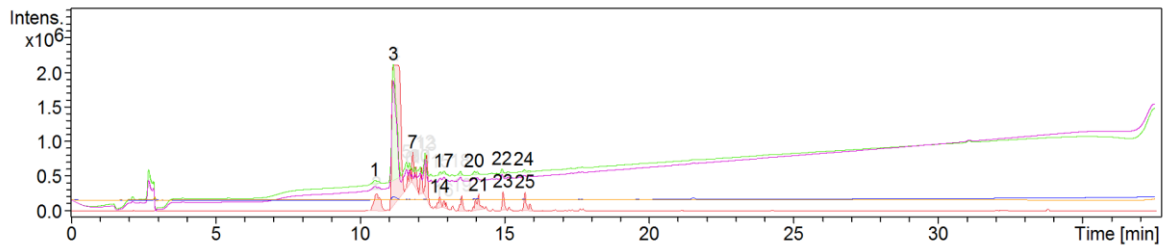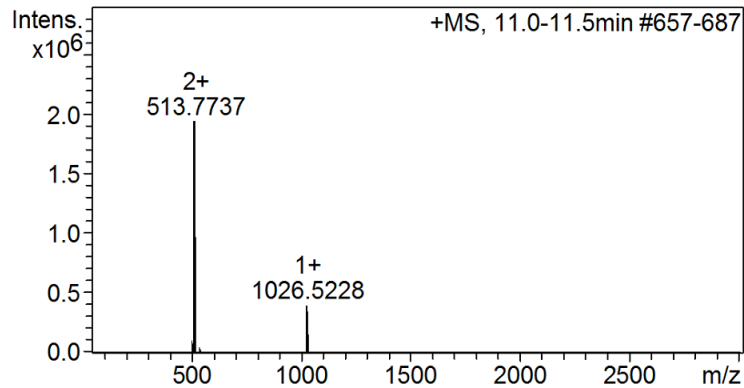

**Figure S11.** LC-MS spectrum of  $^{10}\text{HDGYCL}^{15}+^{29}\text{Y}+^{41}\text{R}$  fragment.

**Acquisition Parameter**

|             |            |                       |           |                  |           |
|-------------|------------|-----------------------|-----------|------------------|-----------|
| Source Type | ESI        | Ion Polarity          | Positive  | Set Nebulizer    | 0.5 Bar   |
| Focus       | Not active | Set Capillary         | 4500 V    | Set Dry Heater   | 200 °C    |
| Scan Begin  | 50 m/z     | Set End Plate Offset  | -500 V    | Set Dry Gas      | 5.0 l/min |
| Scan End    | 3000 m/z   | Set Collision Cell RF | 600.0 Vpp | Set Divert Valve | Waste     |

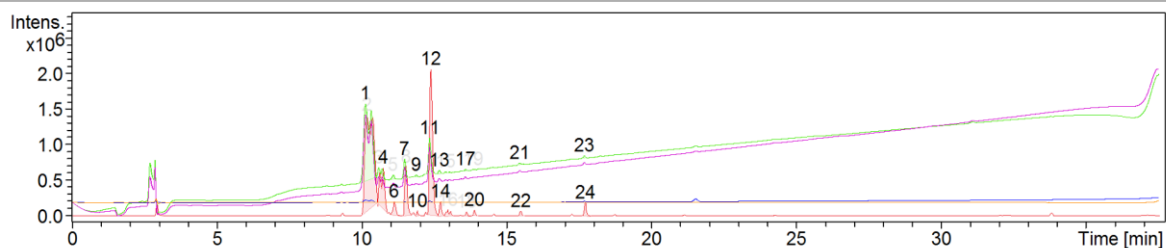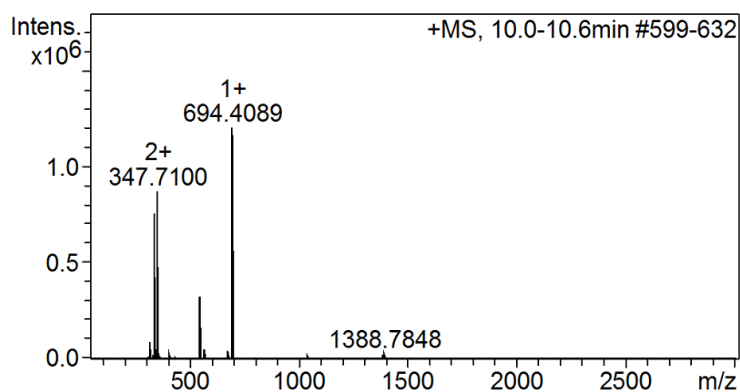

**Figure S12.** LC-MS spectrum of  $^{43}\text{QYRDL}^{47}$  fragment.

A)  $c=50\ \mu\text{M}$

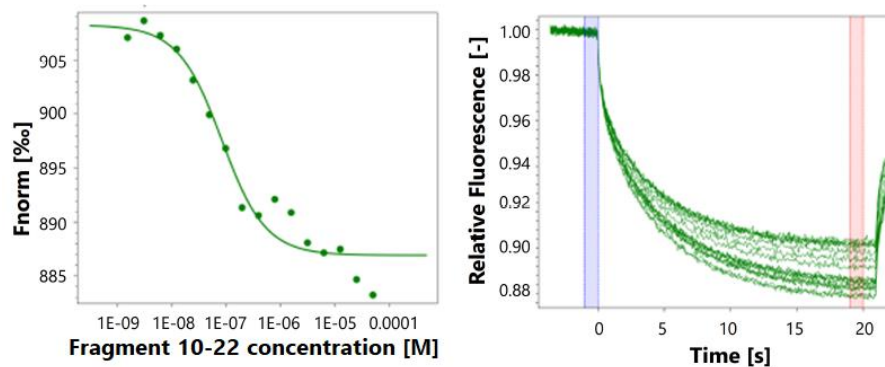

B)  $c=100\ \mu\text{M}$

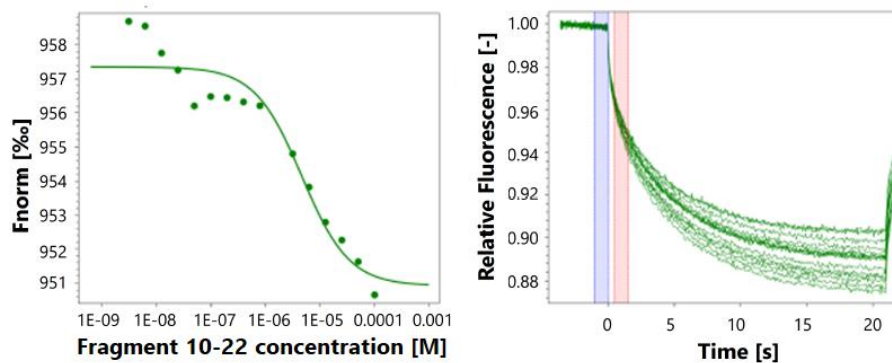

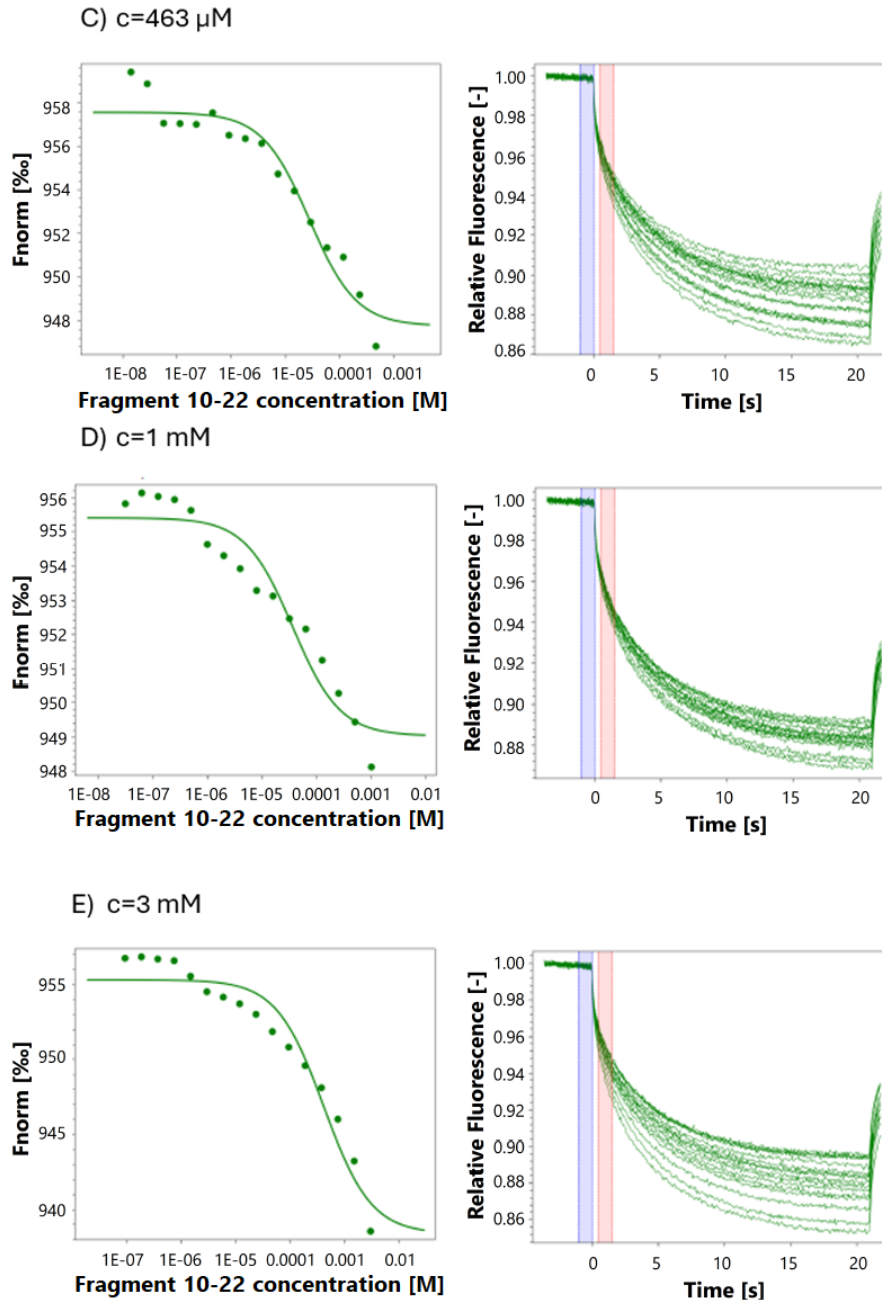

**Figure S13.** MST analysis for fragment 10-22 ( $^{10}\text{HDGYCLHDGVCMY}^{22}$ ) at different concentrations. Assay concentrations: A)  $c = 50\ \mu\text{M}$ , B)  $c = 100\ \mu\text{M}$ , C)  $c = 463\ \mu\text{M}$ , D)  $c = 1\ \text{mM}$ , E)  $c = 3\ \text{mM}$ .

A)  $c=10\ \mu\text{M}$

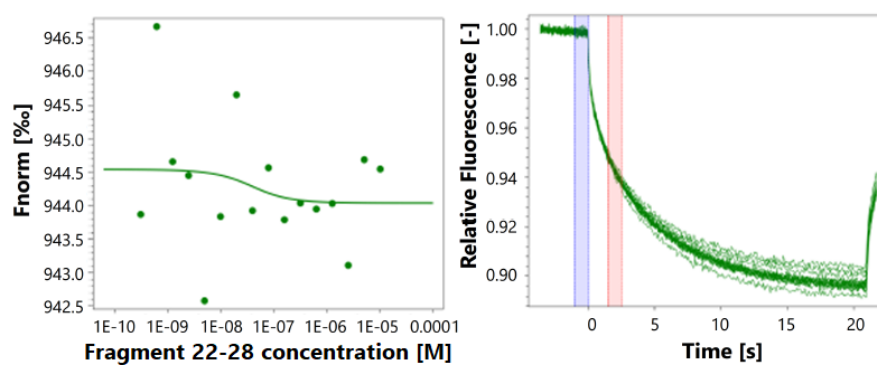

B)  $c=250\ \mu\text{M}$

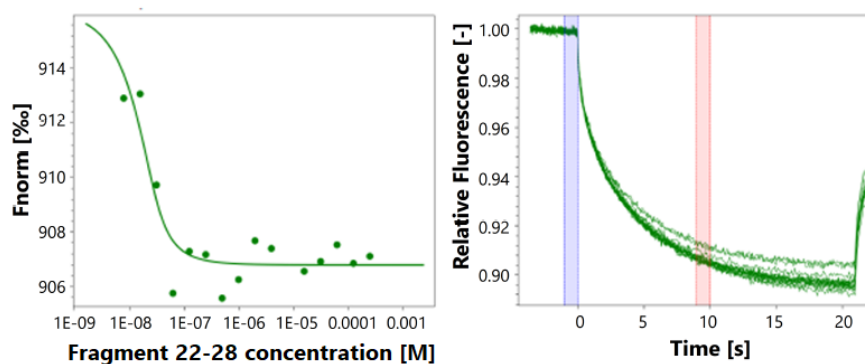

C)  $c=500\ \mu\text{M}$

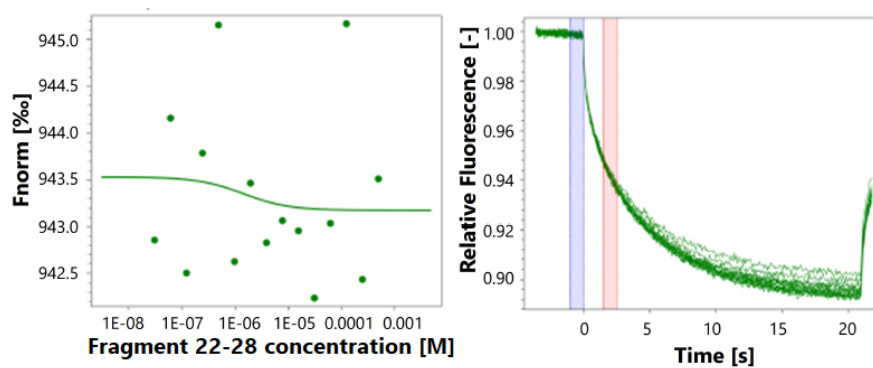

D)  $c=3\ \text{mM}$

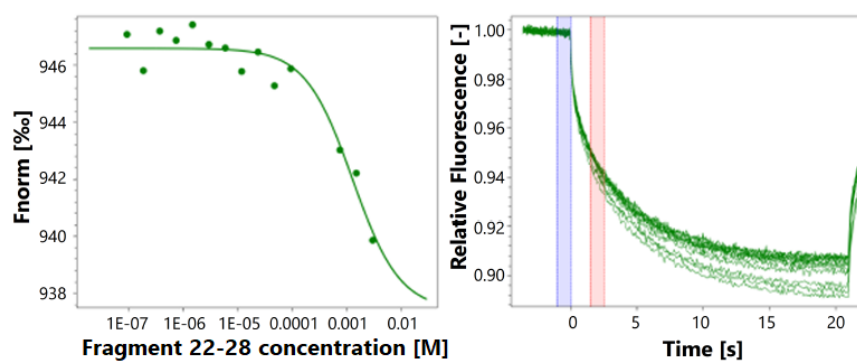

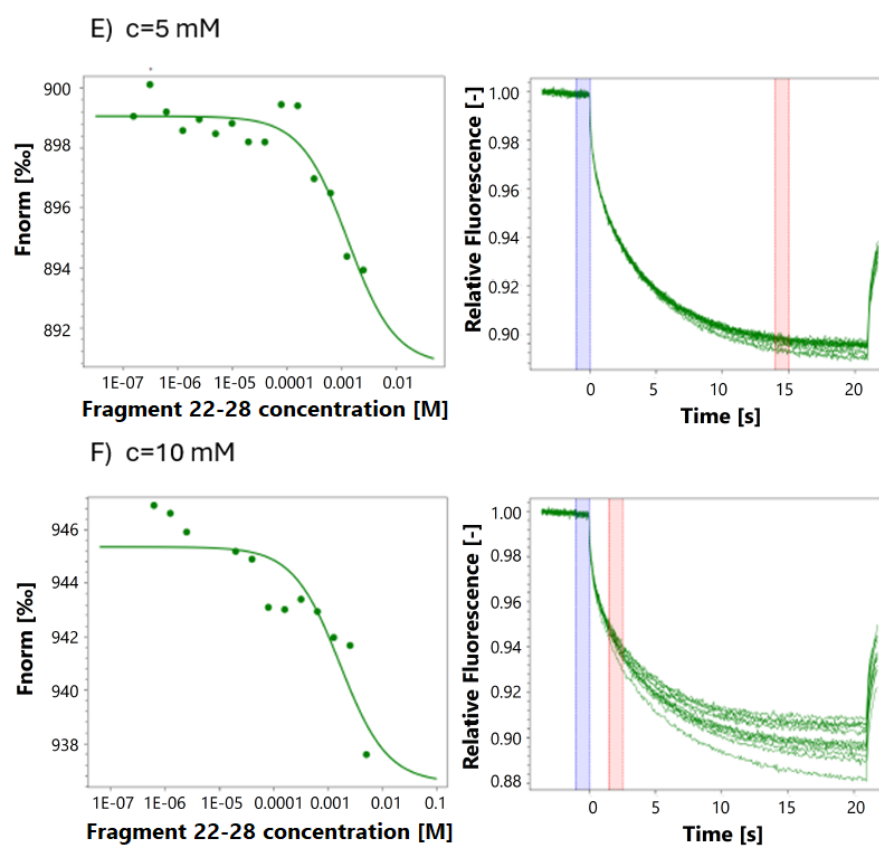

**Figure S14.** MST analysis for fragment 22-28 ( $^{22}\text{YIEALDK}^{28}$ ) at different concentrations. Assay concentrations: A)  $c = 10\text{ }\mu\text{M}$ , B)  $c = 250\text{ }\mu\text{M}$ , C)  $c = 500\text{ }\mu\text{M}$ , D)  $c = 3\text{ mM}$ , E)  $c = 5\text{ mM}$ , F)  $c = 10\text{ mM}$ .

A)  $c=1.25\ \mu\text{M}$

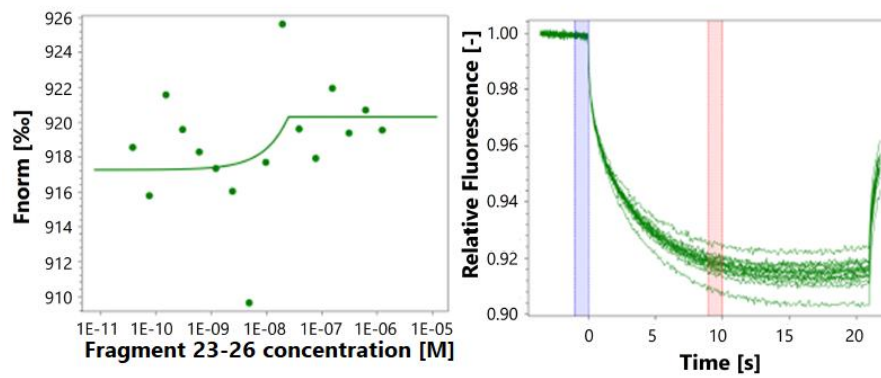

B)  $c=2.5\ \mu\text{M}$

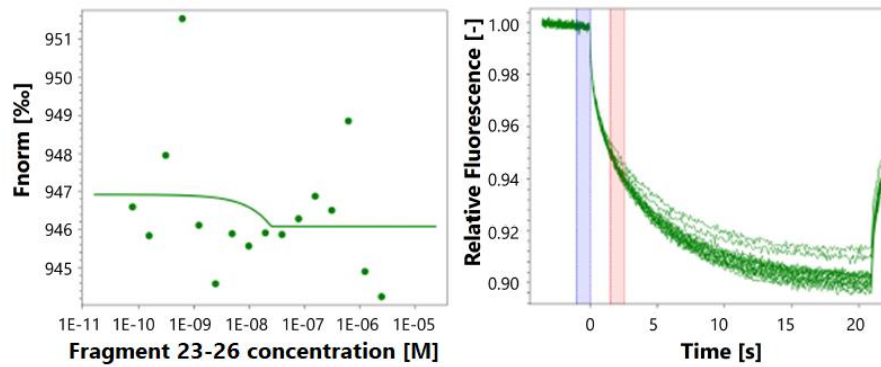

C)  $c=50\ \mu\text{M}$

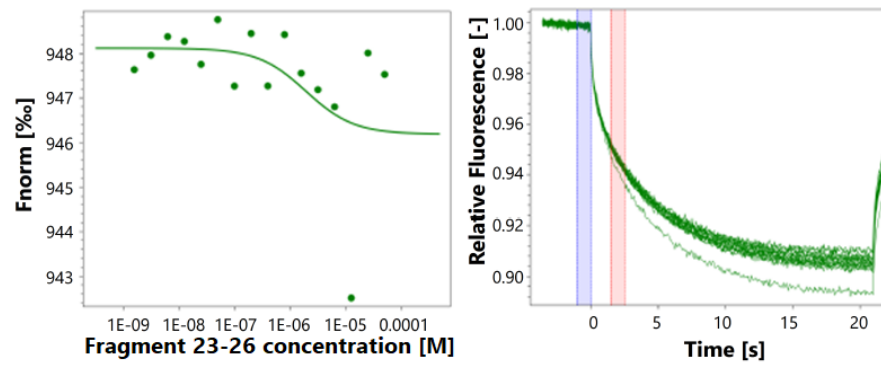

D)  $c=100\ \mu\text{M}$

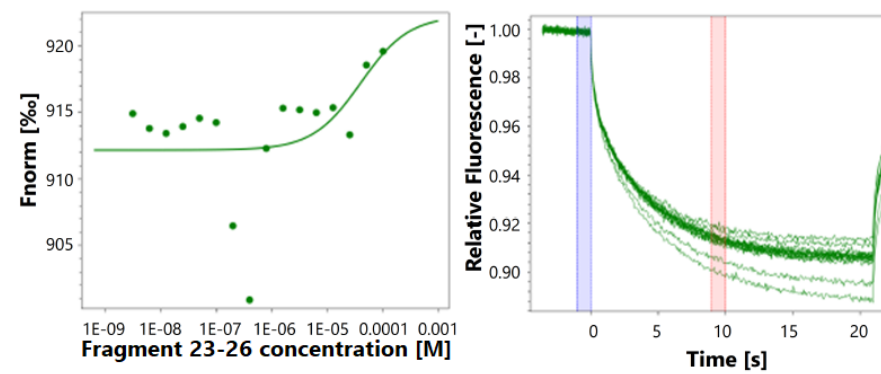



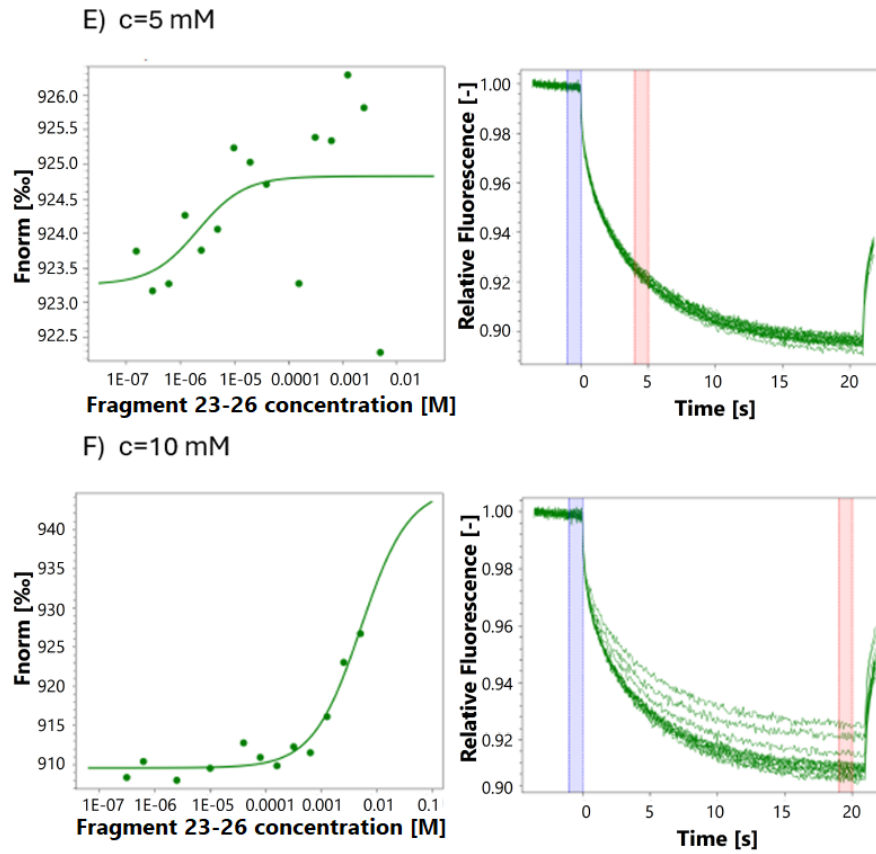

**Figure S15.** MST analysis for fragment 23-26 ( $^{23}\text{IEAL}^{26}$ ) at different concentrations. Assay concentrations: A)  $c = 1.25\text{ }\mu\text{M}$ , B)  $c = 2.5\text{ }\mu\text{M}$ , C)  $c = 50\text{ }\mu\text{M}$ , D)  $c = 100\text{ }\mu\text{M}$ , E)  $c = 5\text{ mM}$ , F)  $c = 10\text{ mM}$ .

A)  $c=50\ \mu\text{M}$

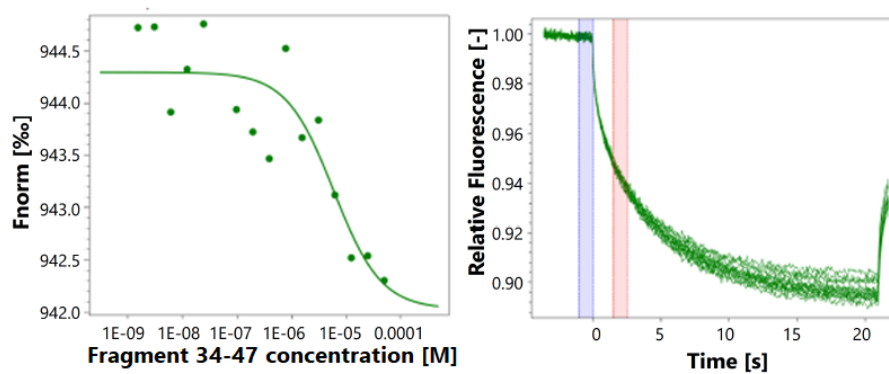

B)  $c=141\ \mu\text{M}$

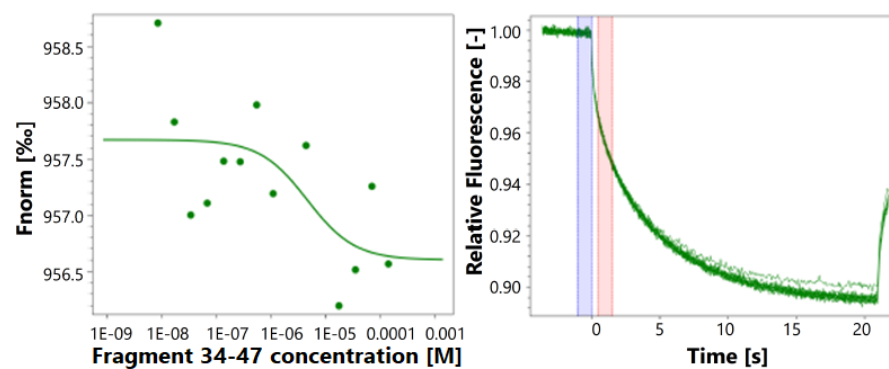

C)  $c=350\ \mu\text{M}$

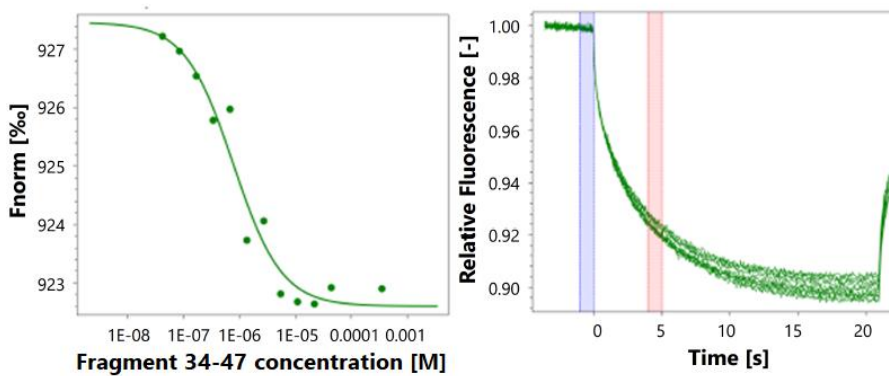

D)  $c=705\ \mu\text{M}$

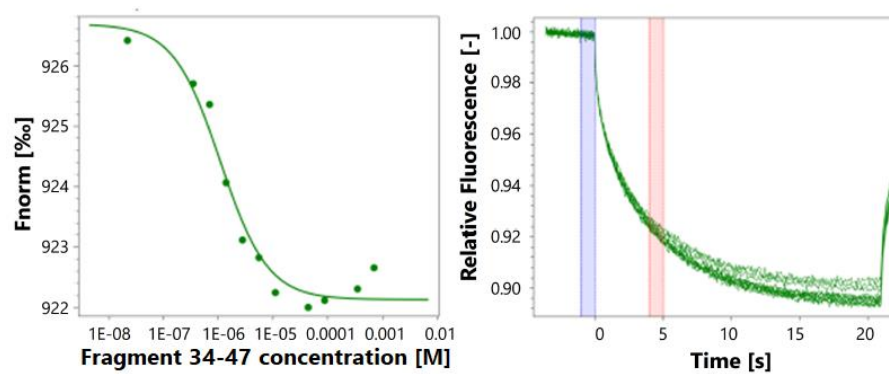

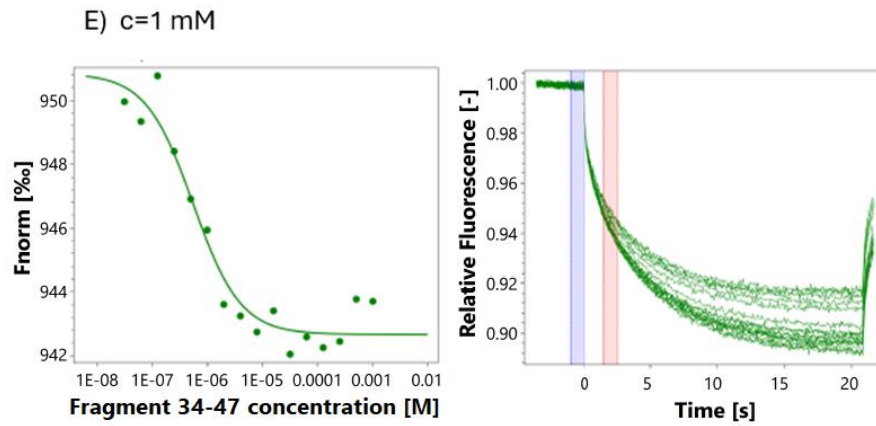

**Figure S16.** MST analysis for fragment 34-47 ( $^{34}\text{VVG YIGERCQYRDL}^{47}$ ) at different concentrations. Assay concentrations: A)  $c = 50\text{ }\mu\text{M}$ , B)  $c = 141\text{ }\mu\text{M}$ , C)  $c = 350\text{ }\mu\text{M}$ , D)  $c = 705\text{ }\mu\text{M}$ , E)  $c = 1\text{ mM}$ .

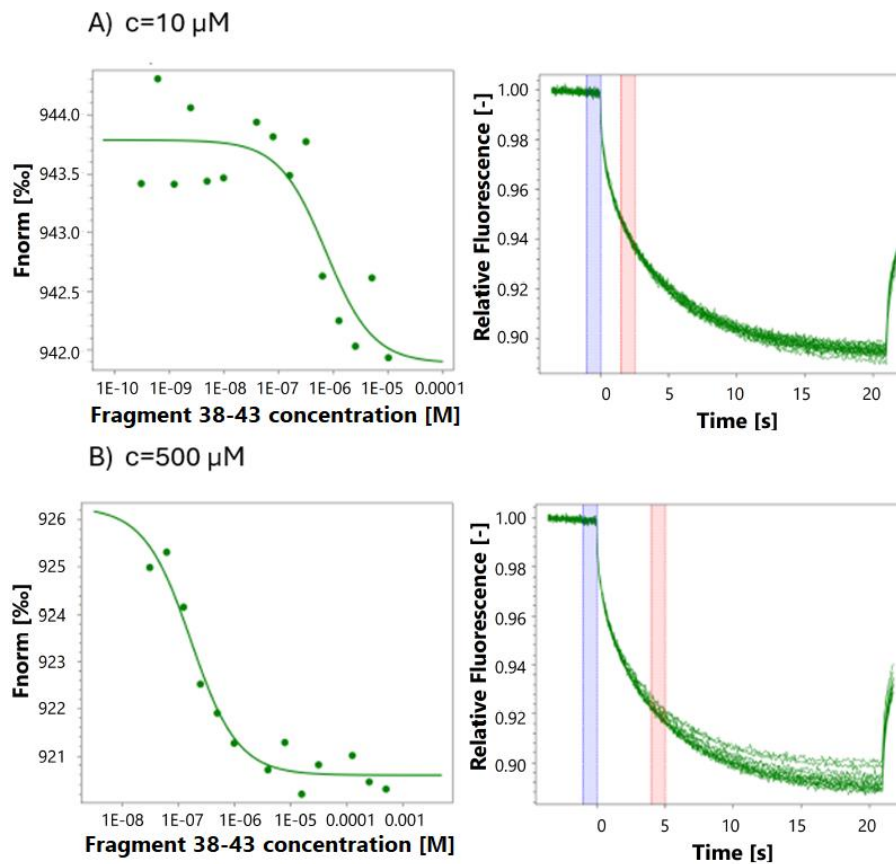

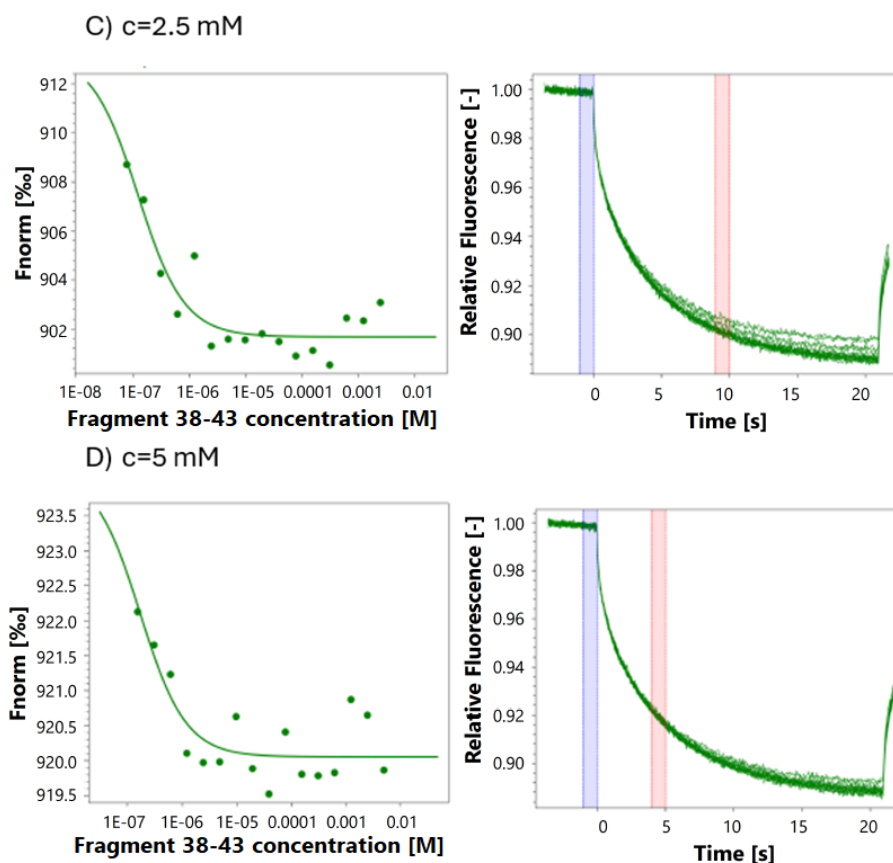

**Figure S17.** MST analysis for fragment 38-43 ( $^{38}\text{IGERCQ}^{43}$ ) at different concentrations. Assay concentrations: A)  $c = 10\ \mu\text{M}$ , B)  $c = 500\ \mu\text{M}$ , C)  $c = 2.5\ \text{mM}$ , D)  $c = 5\ \text{mM}$ .

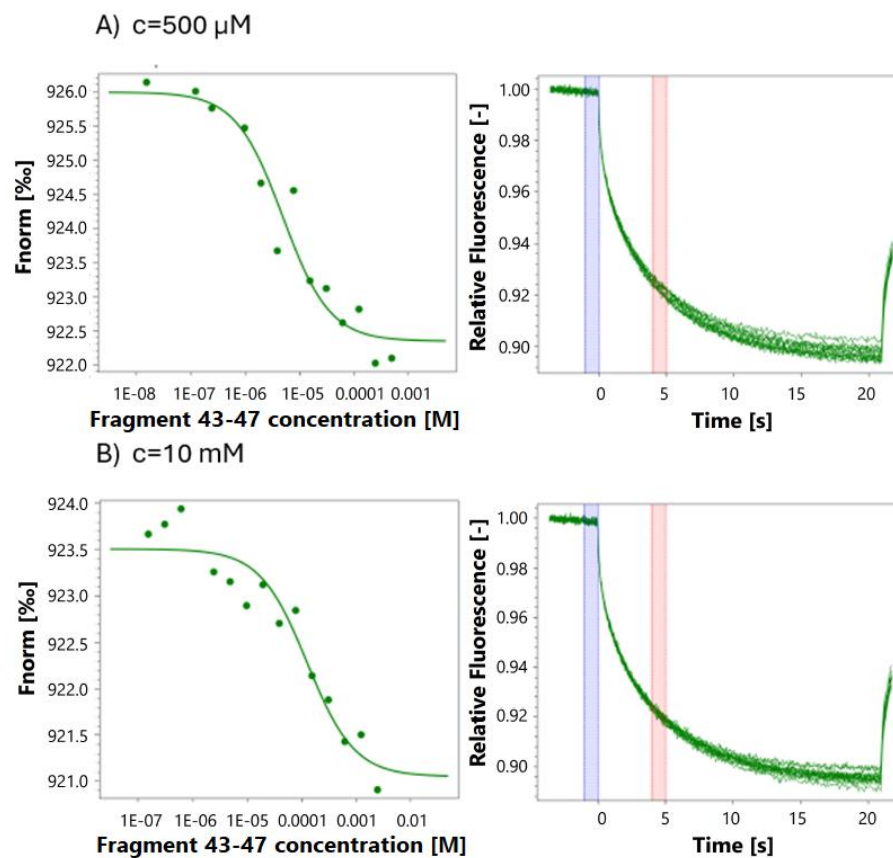

**Figure S18.** MST analysis for fragment 43-47 ( $^{43}\text{QYRDL}^{47}$ ) at different concentrations. Assay concentrations: A)  $c = 500 \mu\text{M}$ , B)  $c = 10 \text{ mM}$ .

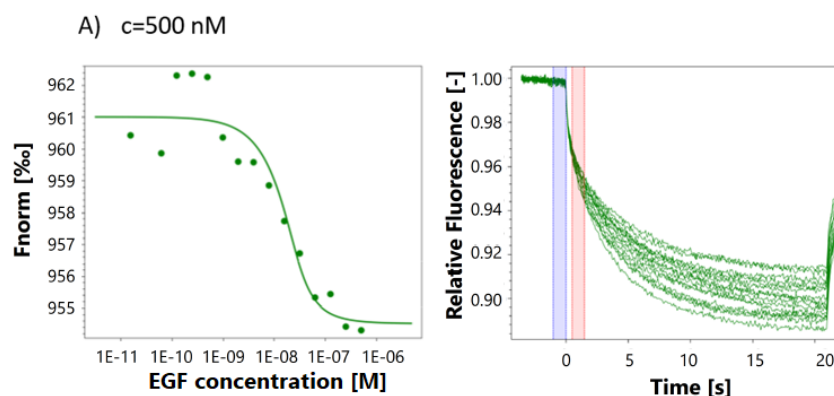

**Figure S19.** MST analysis for EGF. Assay concentrations: A)  $c = 500 \text{ nM}$ .

<sup>1</sup> J. Fraczyk, M. Walczak, and Z. J. Kaminski, "New methodology for automated SPOT synthesis of peptides on cellulose using 1,3,5-triazine derivatives as linkers and as coupling reagents," *J. Pept. Sci.*, vol. 24, no. 2, pp. 1–12, 2018, doi: 10.1002/psc.3063.

<sup>2</sup> B. Kolesinska, K. K. Rozniakowski, J. Fraczyk, I. Relich, A. M. Papini, and Z. J. Kaminski, "The Effect of Counterion and Tertiary Amine on the Efficiency of *N*-Triazinylammonium Sulfonates in Solution and Solid-Phase Peptide Synthesis," *European J. Org. Chem.*, vol. 2015, no. 2, pp. 401–408, Jan. 2015, doi: 10.1002/ejoc.201402862.
